# Supplementary material for: A Genetic Variant rs10251977 in Long Non-coding RNA EGFR-AS1 Creates a New Binding Site for miR-891b and Modulates the Expression of EGFR A/D Isoforms
Source: Research Square preprint supplement (doi:10.21203/rs.3.rs-136285/v1), 2020-12-31
Supplement: Supplementary file 1 [file 82fa3a56e61125b889882e06.docx]

**Supplementary materials**

**A genetic variant *rs10251977* in long non-coding RNA EGFR-AS1 creates a new binding site for miR-891b and modulates the expression of EGFR A/D isoforms**

Shankar Dhamodharan1,+, Mathew Maria Rose1,+, Reddy Chakkarappan Sundaram1,4, Karuppiah Vijayamuthuramalingam Uma Dharshini1, Ramalingam Arulmurugan2, Shanmugam Subbiah2, Ituro Inoue3, Arasambattu Kannan Munirajan1,*.

1Department of Genetics, Dr. ALM PG Institute of Basic Medical Sciences, University of Madras, Taramani Campus, Chennai-600 113, India.

2Center for Oncology, Royapettah Government Hospital & Kilpauk Medical College, Royapettah, Chennai-600 014, India.

3Division of Human genetics, National Institute of Genetics, Mishima- 411-8540, Japan

4Department of Health Research – Multi Disciplinary Research Unit (DHR-MRU), Dr. ALM PG Institute of Basic Medical Sciences, University of Madras, Taramani Campus, Chennai-600 113, India.

+ These authors contributed equally to this work

***Correspondence to:**

Arasambattu Kannan Munirajan, PhD

Department of Genetics

Dr. ALM PG Institute of Basic Medical Sciences

University of Madras, Taramani Campus

Chennai – 600113, India.

Phone: +91-44-24547064, Fax: +91-44-24540709

E-mail: [akmunirajan@gmail.com](about:blank); [akmunirajan@unom.ac.in](about:blank).

**Figure S1**


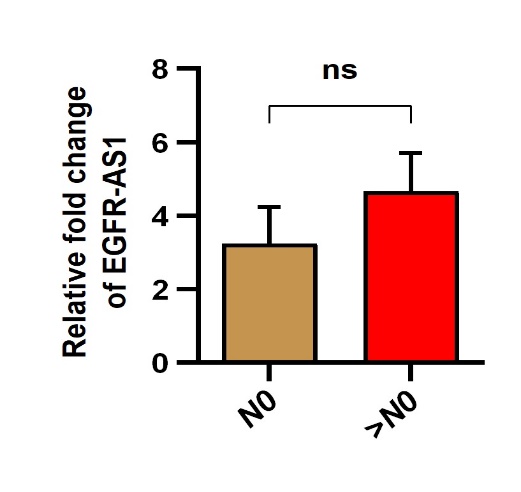

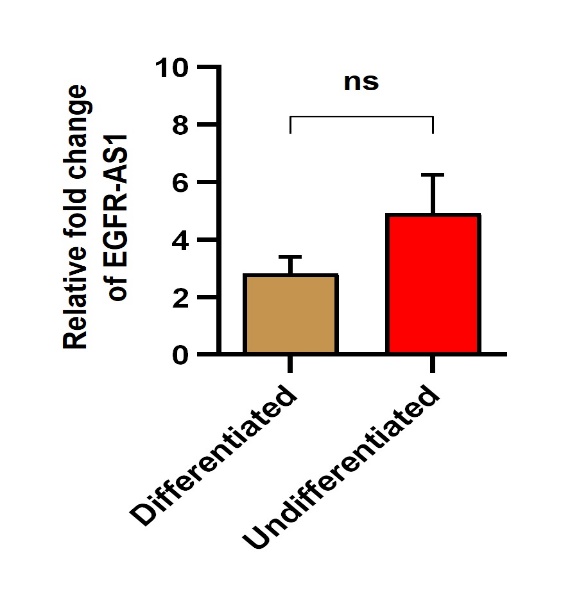

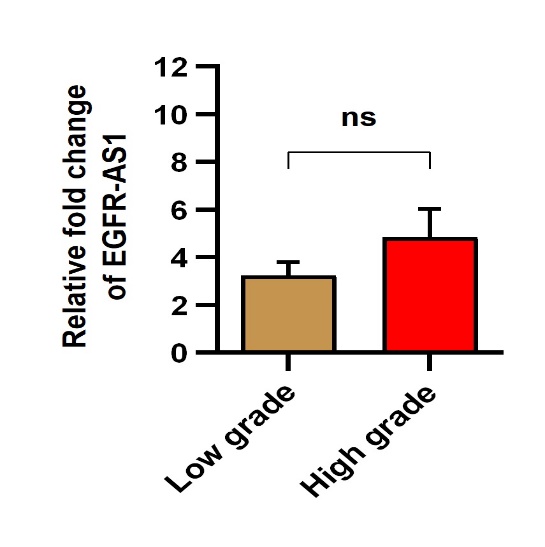

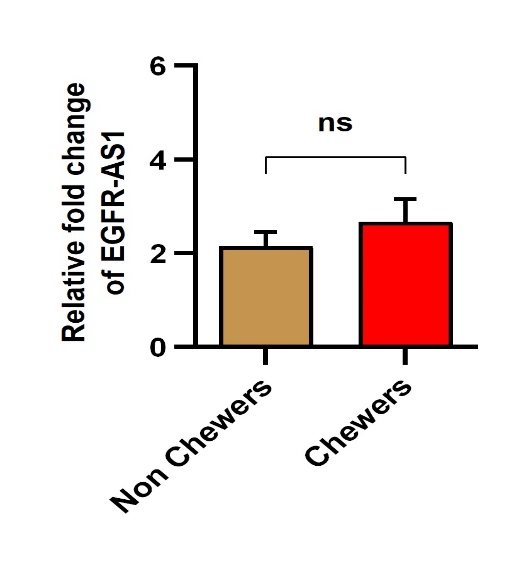


**a**


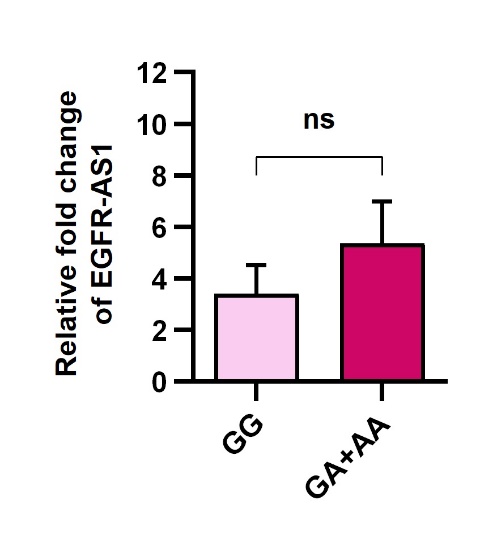


**b**

**Figure S2**


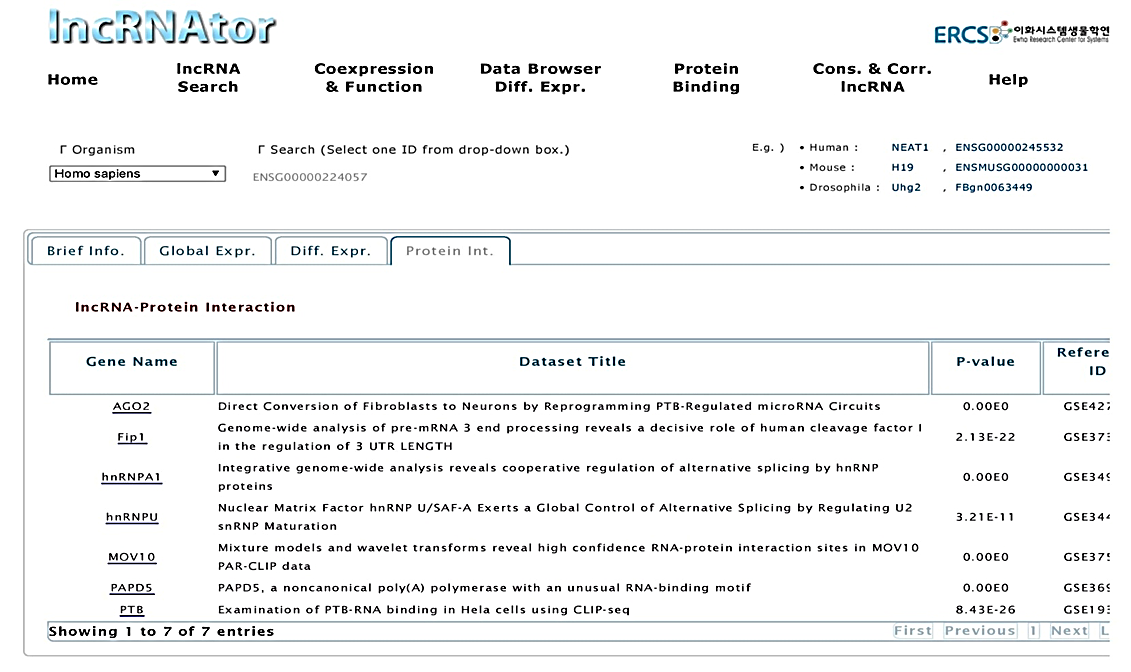


**a**


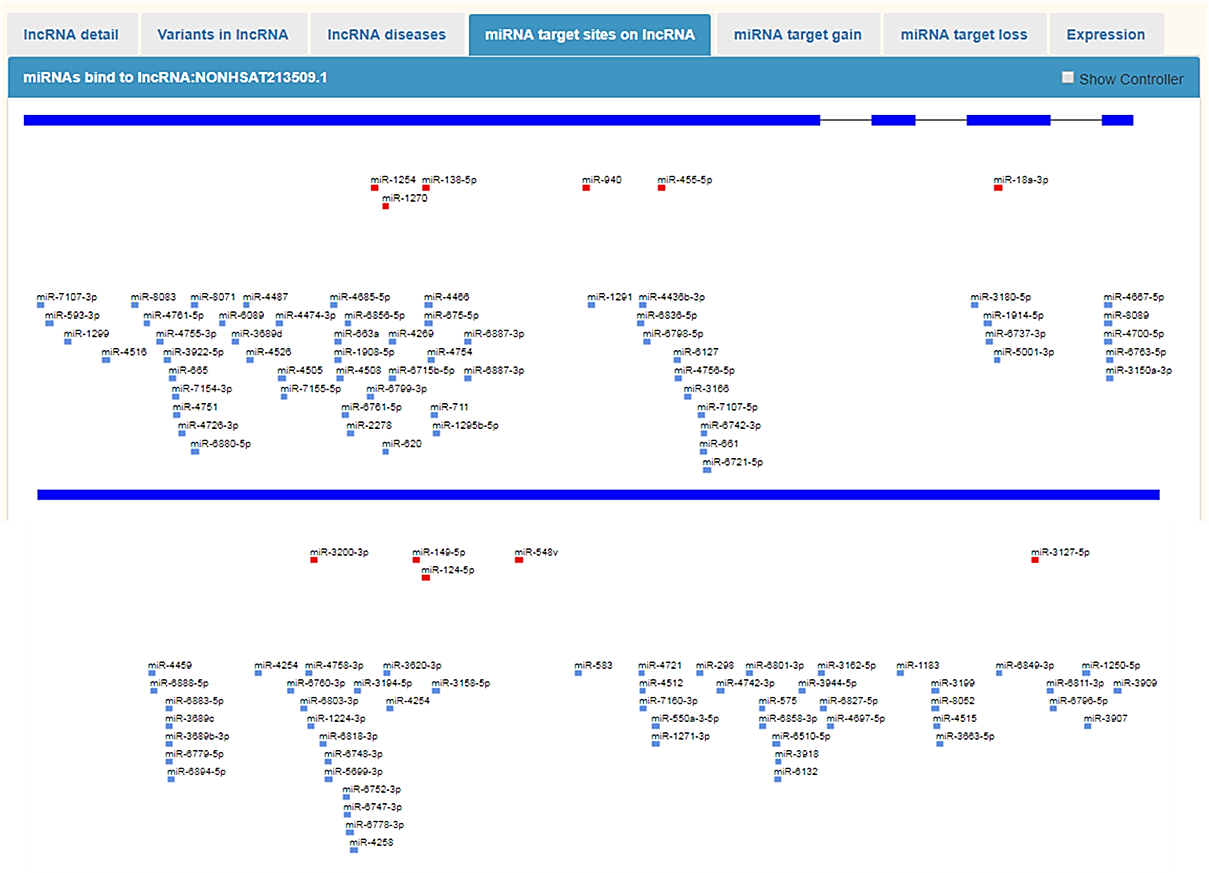


**b**

**Figure S3**

**
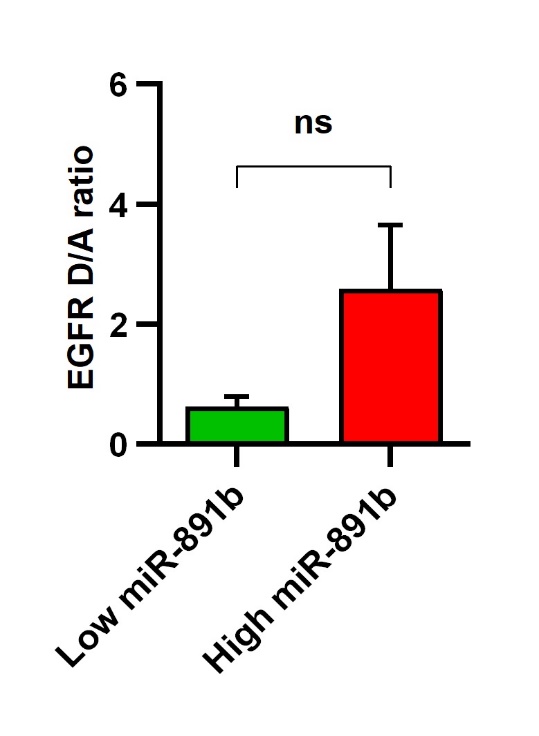

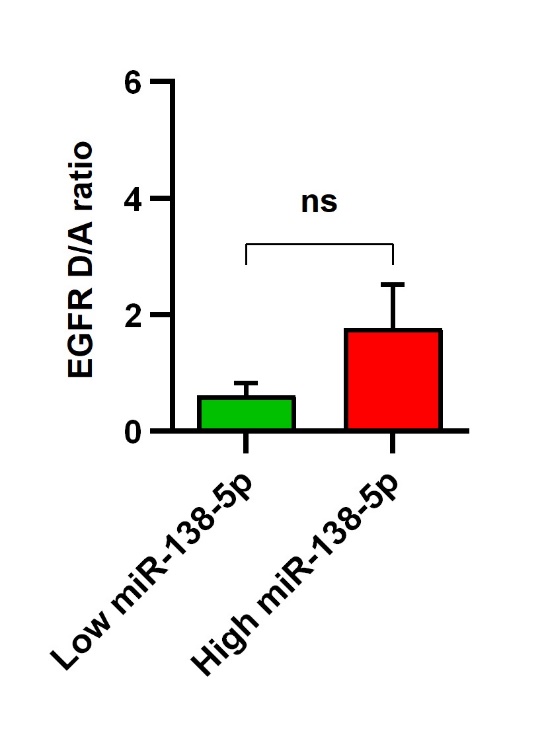
**

**b**

**a**

**Table S1. Table showing the prevalence of binding motif of PTBP1 in EGFR-AS1 using RBPmap online tool:**

| **Protein: PTBP1(Hs/Mm)** | | | | |
| --- | --- | --- | --- | --- |
| **Sequence Position** | **Motif** | **K-mer** | **Z-score** | **P-value** |
| 38 | ucuu | ucuu | 2.58 | 4.94E-03 |
| 213 | cucucu | gugucu | 2.196 | 1.40E-02 |
| 220 | cucucu | cucccu | 2.946 | 1.61E-03 |
| 222 | cucucu | cccucc | 2.25 | 1.22E-02 |
| 224 | cucucu | cucccu | 2.955 | 1.56E-03 |
| 226 | cucucu | cccucu | 2.955 | 1.56E-03 |
| 228 | cucucu | cucugg | 2.259 | 1.19E-02 |
| 233 | cucucu | gucccu | 2.259 | 1.19E-02 |
| 244 | cucucu | aucucu | 2.955 | 1.56E-03 |
| 246 | cucucu | cucugg | 2.205 | 1.37E-02 |
| 253 | cucucu | cccccu | 1.911 | 2.80E-02 |
| 265 | cucucu | cugucg | 1.839 | 3.30E-02 |
| 450 | ucuu | ucuu | 2.161 | 1.53E-02 |
| 451 | cucucu | cuuucu | 1.92 | 2.74E-02 |
| 481 | cucucu | cuggcu | 1.839 | 3.30E-02 |
| 492 | cucucu | uucugu | 1.839 | 3.30E-02 |
| 500 | cucucu | cugucu | 2.259 | 1.19E-02 |
| 502 | cucucu | gucucc | 1.884 | 2.98E-02 |
| 523 | cucucu | cuaccu | 2.625 | 4.33E-03 |
| 532 | cucucu | cacucu | 3.232 | 6.15E-04 |
| 534 | cucucu | cucugc | 2.58 | 4.94E-03 |
| 537 | cucucu | ugcucu | 2.58 | 4.94E-03 |
| 539 | cucucu | cucucu | 3.607 | 1.55E-04 |
| 541 | cucucu | cucuca | 3.232 | 6.15E-04 |
| 551 | cucucu | cgcccu | 2.58 | 4.94E-03 |
| 555 | cucucu | cuggcu | 2.58 | 4.94E-03 |
| 557 | cucucu | ggcucu | 2.58 | 4.94E-03 |
| 559 | cucucu | cucugg | 2.482 | 6.53E-03 |
| 626 | cucucu | cgcccu | 2.071 | 1.92E-02 |
| 628 | cucucu | cccucu | 2.839 | 2.26E-03 |
| 630 | cucucu | cucugu | 2.839 | 2.26E-03 |
| 632 | cucucu | cuguca | 2.188 | 1.43E-02 |
| 639 | cucucu | cuccuu | 2.188 | 1.43E-02 |
| 652 | cucucu | cucacu | 2.813 | 2.45E-03 |
| 1053 | cucucu | cuccuu | 1.929 | 2.69E-02 |
| 1057 | cucucu | uuaucu | 1.929 | 2.69E-02 |
| 1059 | cucucu | aucucc | 1.929 | 2.69E-02 |
| 1061 | cucucu | cucccc | 1.929 | 2.69E-02 |
| 1064 | cucucu | cccucc | 1.929 | 2.69E-02 |
| 1066 | cucucu | cucccc | 1.929 | 2.69E-02 |
| 1072 | cucucu | guaucu | 1.929 | 2.69E-02 |
| 1074 | cucucu | aucucc | 1.929 | 2.69E-02 |
| 1076 | cucucu | cucccu | 2.304 | 1.06E-02 |
| 1081 | cucucu | uucccu | 1.929 | 2.69E-02 |
| 1098 | cucucu | cgaucu | 1.839 | 3.30E-02 |
| 1137 | ucuu | uauu | 1.884 | 2.98E-02 |
| 1142 | ucuu | ucuu | 2.446 | 7.22E-03 |
| 1148 | ucuu | uguu | 1.884 | 2.98E-02 |
| 1373 | ucuu | ucuu | 2.161 | 1.53E-02 |
| 1580 | cucucu | aucucu | 2.179 | 1.47E-02 |
| 1581 | ucuu | ucuc | 1.884 | 2.98E-02 |
| 1582 | cucucu | cucuga | 1.866 | 3.10E-02 |
| 1583 | ucuu | ucug | 1.884 | 2.98E-02 |
| 1603 | cucucu | guaucu | 1.884 | 2.98E-02 |
| 1605 | cucucu | aucuuu | 1.884 | 2.98E-02 |
| 1606 | ucuu | ucuu | 2.58 | 4.94E-03 |
| 1892 | cucucu | cucugc | 1.83 | 3.36E-02 |
| 1914 | cucucu | agcucu | 1.884 | 2.98E-02 |
| 1916 | cucucu | cucuuu | 2.205 | 1.37E-02 |
| 1917 | ucuu | ucuu | 2.446 | 7.22E-03 |
| 1918 | cucucu | cuuuca | 1.732 | 4.16E-02 |
| 1940 | ucuu | uuuu | 1.884 | 2.98E-02 |
| 2002 | cucucu | auuucu | 2.563 | 5.19E-03 |
| 2019 | cucucu | gucucu | 3.277 | 5.25E-04 |
| 2021 | cucucu | cucucu | 3.679 | 1.17E-04 |
| 2023 | cucucu | cucugu | 3.304 | 4.77E-04 |
| 2043 | cucucu | cucccu | 3.277 | 5.25E-04 |
| 2045 | cucucu | cccuau | 2.491 | 6.37E-03 |
| 2149 | ucuu | acuu | 2.161 | 1.53E-02 |

**Table S2. Table showing the prevalence of binding motif of PTBP1 in EGFR 15 and 16 exons using RBPmap online tool:**

| **Protein: PTBP1(Hs/Mm)** | | | | | |
| --- | --- | --- | --- | --- | --- |
| **Sequence Position** | **Genomic Coordinate** | **Motif** | **K-mer** | **Z-score** | **P-value** |
| 32 | chr7:55165469 | cucucu | uccucu | 2.045 | 2.04E-02 |
| 34 | chr7:55165471 | cucucu | cucucu | 2.795 | 2.60E-03 |
| 35 | chr7:55165472 | ucuu | ucuc | 1.884 | 2.98E-02 |
| 36 | chr7:55165473 | cucucu | cucuug | 2.179 | 1.47E-02 |
| 37 | chr7:55165474 | ucuu | ucuu | 2.446 | 7.22E-03 |
| 293 | chr7:55165730 | cucucu | cagucu | 2.071 | 1.92E-02 |
| 295 | chr7:55165732 | cucucu | gucucc | 2.071 | 1.92E-02 |
| 313 | chr7:55165750 | cucucu | guuucu | 2.089 | 1.84E-02 |
| 315 | chr7:55165752 | cucucu | uucucu | 2.652 | 4.00E-03 |
| 317 | chr7:55165754 | cucucu | cucucc | 2.652 | 4.00E-03 |
| 325 | chr7:55165762 | cucucu | auuucu | 2.018 | 2.18E-02 |
| 704 | chr7:55166141 | cucucu | aacucu | 1.679 | 4.66E-02 |
| 706 | chr7:55166143 | cucucu | cucugu | 1.982 | 2.37E-02 |
| 764 | chr7:55166201 | cucucu | cacucu | 2.116 | 1.72E-02 |
| 766 | chr7:55166203 | cucucu | cucuga | 1.741 | 4.08E-02 |
| 767 | chr7:55166204 | ucuu | ucug | 1.884 | 2.98E-02 |
| 778 | chr7:55166215 | cucucu | guaucu | 1.741 | 4.08E-02 |
| 781 | chr7:55166218 | ucuu | ucuu | 2.446 | 7.22E-03 |
| 784 | chr7:55166221 | ucuu | uauu | 1.884 | 2.98E-02 |
| 898 | chr7:55166335 | ucuu | gcuu | 2.161 | 1.53E-02 |
| 899 | chr7:55166336 | cucucu | cuuugu | 1.929 | 2.69E-02 |
| 902 | chr7:55166339 | ucuu | uguu | 2.161 | 1.53E-02 |
| 912 | chr7:55166349 | ucuu | uguu | 2.161 | 1.53E-02 |
| 917 | chr7:55166354 | cucucu | cucauu | 2.116 | 1.72E-02 |
| 918 | chr7:55166355 | ucuu | ucau | 2.161 | 1.53E-02 |
| 919 | chr7:55166356 | cucucu | cauucu | 2.116 | 1.72E-02 |
| 921 | chr7:55166358 | cucucu | uucuuu | 2.116 | 1.72E-02 |
| 922 | chr7:55166359 | ucuu | ucuu | 2.714 | 3.32E-03 |
| 923 | chr7:55166360 | cucucu | cuuucu | 2.679 | 3.69E-03 |
| 925 | chr7:55166362 | cucucu | uucucu | 2.67 | 3.79E-03 |
| 926 | chr7:55166363 | ucuu | ucuc | 2.152 | 1.57E-02 |
| 927 | chr7:55166364 | cucucu | cucuga | 2.116 | 1.72E-02 |
| 928 | chr7:55166365 | ucuu | ucug | 2.134 | 1.64E-02 |
| 935 | chr7:55166372 | cucucu | ccaucu | 2.116 | 1.72E-02 |
| 937 | chr7:55166374 | cucucu | aucugu | 2.116 | 1.72E-02 |
| 938 | chr7:55166375 | ucuu | ucug | 2.134 | 1.64E-02 |
| 939 | chr7:55166376 | cucucu | cuguau | 2.116 | 1.72E-02 |
| 956 | chr7:55166393 | ucuu | ccuu | 2.134 | 1.64E-02 |
| 969 | chr7:55166406 | ucuu | ucuu | 3.268 | 5.42E-04 |
| 974 | chr7:55166411 | ucuu | ccuu | 2.438 | 7.38E-03 |
| 976 | chr7:55166413 | cucucu | uucucu | 2.955 | 1.56E-03 |
| 977 | chr7:55166414 | ucuu | ucuc | 2.438 | 7.38E-03 |
| 978 | chr7:55166415 | cucucu | cucugu | 2.955 | 1.56E-03 |
| 979 | chr7:55166416 | ucuu | ucug | 2.438 | 7.38E-03 |
| 986 | chr7:55166423 | cucucu | cucacu | 2.955 | 1.56E-03 |
| 988 | chr7:55166425 | cucucu | cacuuu | 2.25 | 1.22E-02 |
| 989 | chr7:55166426 | ucuu | acuu | 2.438 | 7.38E-03 |
| 990 | chr7:55166427 | cucucu | cuuucu | 2.955 | 1.56E-03 |
| 992 | chr7:55166429 | cucucu | uucuuu | 2.25 | 1.22E-02 |
| 993 | chr7:55166430 | ucuu | ucuu | 3.277 | 5.25E-04 |
| 995 | chr7:55166432 | cucucu | uuuucu | 2.25 | 1.22E-02 |
| 997 | chr7:55166434 | cucucu | uucugu | 2.25 | 1.22E-02 |
| 998 | chr7:55166435 | ucuu | ucug | 2.152 | 1.57E-02 |
| 2334 | chr7:55167771 | cucucu | cuuucu | 1.92 | 2.74E-02 |
| 2350 | chr7:55167787 | ucuu | ucau | 2.098 | 1.80E-02 |
| 2357 | chr7:55167794 | cucucu | aucucc | 1.884 | 2.98E-02 |
| 2358 | chr7:55167795 | ucuu | ucuc | 2.429 | 7.57E-03 |
| 2373 | chr7:55167810 | ucuu | ucuu | 3.214 | 6.55E-04 |
| 2381 | chr7:55167818 | ucuu | ucuu | 3.25 | 5.77E-04 |
| 2383 | chr7:55167820 | ucuu | uuuu | 2.411 | 7.95E-03 |
| 2401 | chr7:55167838 | ucuu | ucau | 2.027 | 2.13E-02 |
| 2404 | chr7:55167841 | ucuu | uauu | 2.027 | 2.13E-02 |
| 2623 | chr7:55168060 | ucuu | uauu | 2.027 | 2.13E-02 |
| 2648 | chr7:55168085 | ucuu | ucuu | 2.688 | 3.59E-03 |
| 2651 | chr7:55168088 | ucuu | ucau | 2.098 | 1.80E-02 |
| 2654 | chr7:55168091 | ucuu | uauu | 2.098 | 1.80E-02 |
| 2656 | chr7:55168093 | ucuu | uuuu | 2.098 | 1.80E-02 |
| 2662 | chr7:55168099 | ucuu | ccuu | 2.134 | 1.64E-02 |
| 2684 | chr7:55168121 | cucucu | agcucu | 1.884 | 2.98E-02 |
| 2686 | chr7:55168123 | cucucu | cucugu | 2.259 | 1.19E-02 |
| 2696 | chr7:55168133 | cucucu | cacuuu | 1.875 | 3.04E-02 |
| 2698 | chr7:55168135 | cucucu | cuuugu | 1.875 | 3.04E-02 |
| 2707 | chr7:55168144 | cucucu | cucgau | 1.884 | 2.98E-02 |
| 2806 | chr7:55168243 | ucuu | ucug | 2.134 | 1.64E-02 |
| 2821 | chr7:55168258 | ucuu | uguu | 2.58 | 4.94E-03 |
| 2823 | chr7:55168260 | ucuu | uuuu | 2.58 | 4.94E-03 |
| 2825 | chr7:55168262 | cucucu | uuaucu | 1.929 | 2.69E-02 |
| 2828 | chr7:55168265 | ucuu | ucuu | 3.554 | 1.90E-04 |
| 2832 | chr7:55168269 | cucucu | cccccu | 1.92 | 2.74E-02 |
| 2834 | chr7:55168271 | cucucu | cccuuu | 1.911 | 2.80E-02 |
| 2835 | chr7:55168272 | ucuu | ccuu | 2.571 | 5.07E-03 |
| 2837 | chr7:55168274 | ucuu | uuuu | 2.571 | 5.07E-03 |
| 2839 | chr7:55168276 | cucucu | uucuuu | 1.911 | 2.80E-02 |
| 2840 | chr7:55168277 | ucuu | ucuu | 3.554 | 1.90E-04 |
| 2841 | chr7:55168278 | cucucu | cuuucu | 2.277 | 1.14E-02 |
| 2844 | chr7:55168281 | ucuu | ucuu | 3.554 | 1.90E-04 |
| 2847 | chr7:55168284 | ucuu | ucug | 2.58 | 4.94E-03 |
| 2867 | chr7:55168304 | cucucu | guaucu | 2.196 | 1.40E-02 |
| 2869 | chr7:55168306 | cucucu | aucucu | 2.848 | 2.20E-03 |
| 2871 | chr7:55168308 | cucucu | cucugc | 2.205 | 1.37E-02 |
| 2881 | chr7:55168318 | cucucu | auaucu | 2.277 | 1.14E-02 |
| 2883 | chr7:55168320 | cucucu | aucucu | 3 | 1.35E-03 |
| 2885 | chr7:55168322 | cucucu | cucuau | 3 | 1.35E-03 |
| 2887 | chr7:55168324 | cucucu | cuauau | 2.277 | 1.14E-02 |
| 2895 | chr7:55168332 | cucucu | guaucu | 2.25 | 1.22E-02 |
| 2897 | chr7:55168334 | cucucu | aucucu | 2.946 | 1.61E-03 |
| 2899 | chr7:55168336 | cucucu | cucugu | 2.946 | 1.61E-03 |
| 2901 | chr7:55168338 | cucucu | cugugu | 2.25 | 1.22E-02 |
| 3044 | chr7:55168481 | ucuu | uguu | 2.134 | 1.64E-02 |
| 3053 | chr7:55168490 | ucuu | ucau | 2.161 | 1.53E-02 |
| 3056 | chr7:55168493 | ucuu | uuuu | 2.161 | 1.53E-02 |
| 3057 | chr7:55168494 | ucuu | uuuu | 2.161 | 1.53E-02 |
| 3060 | chr7:55168497 | ucuu | ucua | 2.161 | 1.53E-02 |
| 3064 | chr7:55168501 | cucucu | augucu | 1.911 | 2.80E-02 |
| 3066 | chr7:55168503 | cucucu | gucuuu | 1.911 | 2.80E-02 |
| 3067 | chr7:55168504 | ucuu | ucuu | 2.723 | 3.23E-03 |
| 3068 | chr7:55168505 | cucucu | cuuucu | 2.277 | 1.14E-02 |
| 3070 | chr7:55168507 | cucucu | uucuau | 1.911 | 2.80E-02 |
| 3071 | chr7:55168508 | ucuu | ucua | 2.161 | 1.53E-02 |
| 3072 | chr7:55168509 | cucucu | cuauuu | 1.911 | 2.80E-02 |
| 3073 | chr7:55168510 | ucuu | uauu | 2.446 | 7.22E-03 |
| 3075 | chr7:55168512 | ucuu | uuuu | 2.446 | 7.22E-03 |
| 3076 | chr7:55168513 | ucuu | uuuu | 2.446 | 7.22E-03 |
| 3077 | chr7:55168514 | ucuu | uuuu | 2.446 | 7.22E-03 |
| 3087 | chr7:55168524 | ucuu | uccu | 2.446 | 7.22E-03 |
| 3097 | chr7:55168534 | ucuu | ucuu | 2.723 | 3.23E-03 |
| 3099 | chr7:55168536 | cucucu | uucacu | 1.92 | 2.74E-02 |
| 3101 | chr7:55168538 | cucucu | cacugu | 1.92 | 2.74E-02 |
| 3103 | chr7:55168540 | cucucu | cugucu | 2.295 | 1.09E-02 |
| 3106 | chr7:55168543 | ucuu | ucug | 2.098 | 1.80E-02 |
| 3107 | chr7:55168544 | cucucu | cugacu | 1.92 | 2.74E-02 |
| 3110 | chr7:55168547 | ucuu | acuu | 2.098 | 1.80E-02 |
| 3116 | chr7:55168553 | cucucu | gucucc | 2.116 | 1.72E-02 |
| 3117 | chr7:55168554 | ucuu | ucuc | 2.152 | 1.57E-02 |
| 3118 | chr7:55168555 | cucucu | cuccca | 2.116 | 1.72E-02 |
| 3120 | chr7:55168557 | cucucu | cccacu | 2.116 | 1.72E-02 |
| 3139 | chr7:55168576 | cucucu | cuuucu | 2.67 | 3.79E-03 |
| 3154 | chr7:55168591 | cucucu | auuucu | 2.071 | 1.92E-02 |
| 3156 | chr7:55168593 | cucucu | uucucc | 2.071 | 1.92E-02 |
| 3158 | chr7:55168595 | cucucu | cucccu | 2.625 | 4.33E-03 |
| 3160 | chr7:55168597 | cucucu | cccuuu | 2.098 | 1.80E-02 |
| 3208 | chr7:55168645 | ucuu | uuuu | 2.134 | 1.64E-02 |
| 3217 | chr7:55168654 | ucuu | uauu | 2.027 | 2.13E-02 |
| 3219 | chr7:55168656 | ucuu | uuuu | 2.098 | 1.80E-02 |
| 3222 | chr7:55168659 | ucuu | ucuu | 2.652 | 4.00E-03 |
| 3244 | chr7:55168681 | ucuu | uccu | 2.152 | 1.57E-02 |
| 3288 | chr7:55168725 | ucuu | ucuu | 3.214 | 6.55E-04 |
| 3291 | chr7:55168728 | ucuu | uguu | 2.375 | 8.77E-03 |
| 3294 | chr7:55168731 | ucuu | uauu | 2.375 | 8.77E-03 |
| 3308 | chr7:55168745 | ucuu | ucuu | 3.214 | 6.55E-04 |
| 3311 | chr7:55168748 | ucuu | ucuc | 2.375 | 8.77E-03 |
| 3399 | chr7:55168836 | ucuu | uuuu | 2.152 | 1.57E-02 |
| 3400 | chr7:55168837 | ucuu | uuuu | 2.152 | 1.57E-02 |
| 3401 | chr7:55168838 | ucuu | uuuu | 2.152 | 1.57E-02 |
| 3402 | chr7:55168839 | ucuu | uuuu | 2.152 | 1.57E-02 |
| 3410 | chr7:55168847 | ucuu | ucuu | 2.688 | 3.59E-03 |
| 3422 | chr7:55168859 | ucuu | uauu | 2.152 | 1.57E-02 |
| 3440 | chr7:55168877 | cucucu | cauucc | 1.83 | 3.36E-02 |
| 3441 | chr7:55168878 | cucucu | auuccu | 1.83 | 3.36E-02 |
| 3445 | chr7:55168882 | cucucu | cugaau | 1.83 | 3.36E-02 |
| 3449 | chr7:55168886 | cucucu | auauau | 1.83 | 3.36E-02 |
| 3454 | chr7:55168891 | cucucu | uugucu | 2.571 | 5.07E-03 |
| 3456 | chr7:55168893 | cucucu | gucucu | 3.223 | 6.34E-04 |
| 3458 | chr7:55168895 | cucucu | cucucu | 3.589 | 1.66E-04 |
| 3460 | chr7:55168897 | cucucu | cucuca | 3.223 | 6.34E-04 |
| 3462 | chr7:55168899 | cucucu | cucauu | 2.58 | 4.94E-03 |
| 3465 | chr7:55168902 | cucucu | auuucu | 2.58 | 4.94E-03 |
| 3467 | chr7:55168904 | cucucu | uucuca | 2.58 | 4.94E-03 |
| 3469 | chr7:55168906 | cucucu | cucaga | 1.839 | 3.30E-02 |
| 3479 | chr7:55168916 | cucucu | auguau | 1.839 | 3.30E-02 |
| 3503 | chr7:55168940 | ucuu | uguu | 2.161 | 1.53E-02 |
| 3515 | chr7:55168952 | ucuu | acuu | 2.152 | 1.57E-02 |
| 3528 | chr7:55168965 | ucuu | ucuu | 2.58 | 4.94E-03 |
| 3537 | chr7:55168974 | ucuu | acuu | 1.884 | 2.98E-02 |
| 3661 | chr7:55169098 | ucuu | uauu | 2.161 | 1.53E-02 |
| 3665 | chr7:55169102 | ucuu | ucuu | 2.723 | 3.23E-03 |
| 3667 | chr7:55169104 | ucuu | uuuu | 2.446 | 7.22E-03 |
| 3668 | chr7:55169105 | ucuu | uuuu | 2.446 | 7.22E-03 |
| 3669 | chr7:55169106 | ucuu | uuuu | 2.446 | 7.22E-03 |
| 3670 | chr7:55169107 | ucuu | uuuu | 2.446 | 7.22E-03 |
| 3671 | chr7:55169108 | ucuu | uuuu | 2.446 | 7.22E-03 |
| 3672 | chr7:55169109 | ucuu | uuuu | 2.446 | 7.22E-03 |
| 3673 | chr7:55169110 | ucuu | uuuu | 2.446 | 7.22E-03 |
| 3674 | chr7:55169111 | ucuu | uuuu | 2.446 | 7.22E-03 |
| 3675 | chr7:55169112 | ucuu | uuuu | 2.446 | 7.22E-03 |
| 3691 | chr7:55169128 | ucuu | ucuu | 2.723 | 3.23E-03 |
| 3694 | chr7:55169131 | ucuu | uguu | 2.161 | 1.53E-02 |
| 3697 | chr7:55169134 | ucuu | ucug | 2.152 | 1.57E-02 |
| 3735 | chr7:55169172 | cucucu | cucacu | 1.929 | 2.69E-02 |
| 3752 | chr7:55169189 | cucucu | cuccca | 1.741 | 4.08E-02 |
| 3865 | chr7:55169302 | ucuu | uguu | 2.134 | 1.64E-02 |
| 3875 | chr7:55169312 | ucuu | gcuu | 2.098 | 1.80E-02 |
| 3880 | chr7:55169317 | ucuu | ucuu | 2.652 | 4.00E-03 |
| 3886 | chr7:55169323 | ucuu | ucuc | 2.134 | 1.64E-02 |
| 3888 | chr7:55169325 | ucuu | uccu | 2.134 | 1.64E-02 |
| 4018 | chr7:55169455 | ucuu | gcuu | 1.884 | 2.98E-02 |
| 4027 | chr7:55169464 | ucuu | ucuu | 2.446 | 7.22E-03 |
| 4033 | chr7:55169470 | ucuu | uccu | 1.884 | 2.98E-02 |
| 4267 | chr7:55169704 | cucucu | cccucg | 2.107 | 1.76E-02 |
| 4269 | chr7:55169706 | cucucu | cucgcc | 2.205 | 1.37E-02 |
| 4273 | chr7:55169710 | cucucu | ccuucu | 2.25 | 1.22E-02 |
| 4281 | chr7:55169718 | cucucu | cgcucu | 2.955 | 1.56E-03 |
| 4283 | chr7:55169720 | cucucu | cucuca | 2.955 | 1.56E-03 |
| 4285 | chr7:55169722 | cucucu | cucaca | 2.25 | 1.22E-02 |
| 4292 | chr7:55169729 | cucucu | ccuucu | 2.25 | 1.22E-02 |
| 4294 | chr7:55169731 | cucucu | uucucu | 2.955 | 1.56E-03 |
| 4296 | chr7:55169733 | cucucu | cucucc | 2.955 | 1.56E-03 |
| 4318 | chr7:55169755 | cucucu | cacugu | 2.188 | 1.43E-02 |
| 4320 | chr7:55169757 | cucucu | cugucc | 2.071 | 1.92E-02 |
| 4323 | chr7:55169760 | ucuu | uccu | 2.152 | 1.57E-02 |
| 4324 | chr7:55169761 | ucuu | ccuu | 2.152 | 1.57E-02 |
| 4333 | chr7:55169770 | ucuu | gcuu | 2.152 | 1.57E-02 |
| 4335 | chr7:55169772 | cucucu | uucucu | 2.259 | 1.19E-02 |
| 4336 | chr7:55169773 | ucuu | ucuc | 2.161 | 1.53E-02 |
| 4337 | chr7:55169774 | cucucu | cucuuc | 1.911 | 2.80E-02 |
| 4338 | chr7:55169775 | ucuu | ucuu | 2.705 | 3.42E-03 |
| 4356 | chr7:55169793 | ucuu | ucua | 2.134 | 1.64E-02 |
| 4357 | chr7:55169794 | cucucu | cuaccu | 1.92 | 2.74E-02 |
| 4360 | chr7:55169797 | ucuu | ccuu | 2.134 | 1.64E-02 |
| 4374 | chr7:55169811 | ucuu | ucug | 2.134 | 1.64E-02 |
| 4383 | chr7:55169820 | ucuu | gcuu | 2.098 | 1.80E-02 |
| 4386 | chr7:55169823 | ucuu | ucuu | 2.58 | 4.94E-03 |
| 4389 | chr7:55169826 | ucuu | uguu | 2.027 | 2.13E-02 |
| 4445 | chr7:55169882 | ucuu | ucuu | 2.446 | 7.22E-03 |
| 4467 | chr7:55169904 | cucucu | caaucu | 2.071 | 1.92E-02 |
| 4470 | chr7:55169907 | ucuu | ucug | 2.027 | 2.13E-02 |
| 4474 | chr7:55169911 | cucucu | cccucc | 2.071 | 1.92E-02 |
| 4476 | chr7:55169913 | cucucu | cucccu | 2.625 | 4.33E-03 |
| 4478 | chr7:55169915 | cucucu | cccucu | 2.625 | 4.33E-03 |
| 4480 | chr7:55169917 | cucucu | cucugc | 2.071 | 1.92E-02 |
| 4537 | chr7:55169974 | cucucu | gucugu | 2.071 | 1.92E-02 |
| 4556 | chr7:55169993 | cucucu | cuuucu | 2.67 | 3.79E-03 |
| 4558 | chr7:55169995 | cucucu | uucugu | 2.116 | 1.72E-02 |
| 4560 | chr7:55169997 | cucucu | cugucu | 2.67 | 3.79E-03 |
| 4562 | chr7:55169999 | cucucu | gucuca | 2.116 | 1.72E-02 |
| 4570 | chr7:55170007 | cucucu | cuguuu | 2.107 | 1.76E-02 |
| 4577 | chr7:55170014 | cucucu | gugucu | 2.107 | 1.76E-02 |
| 4579 | chr7:55170016 | cucucu | gucugu | 2.107 | 1.76E-02 |
| 4821 | chr7:55170258 | cucucu | cucccc | 1.696 | 4.49E-02 |
| 4829 | chr7:55170266 | cucucu | gccucu | 1.804 | 3.56E-02 |
| 4831 | chr7:55170268 | cucucu | cucuca | 2.241 | 1.25E-02 |
| 4833 | chr7:55170270 | cucucu | cucaca | 1.902 | 2.86E-02 |
| 4839 | chr7:55170276 | ucuu | uauu | 2.098 | 1.80E-02 |
| 4850 | chr7:55170287 | ucuu | acuu | 2.098 | 1.80E-02 |
| 4856 | chr7:55170293 | cucucu | ccaucu | 2.089 | 1.84E-02 |
| 4858 | chr7:55170295 | cucucu | aucuuu | 1.875 | 3.04E-02 |
| 4859 | chr7:55170296 | ucuu | ucuu | 2.58 | 4.94E-03 |
| 4860 | chr7:55170297 | cucucu | cuuucu | 2.25 | 1.22E-02 |
| 4862 | chr7:55170299 | cucucu | uucucc | 1.884 | 2.98E-02 |
| 4863 | chr7:55170300 | ucuu | ucuc | 2.098 | 1.80E-02 |

**Supplement Table S5. List of Universal reverse transcription primers used for cDNA synthesis:**

| **Study type** | **Primer type** | **Sequence** |
| --- | --- | --- |
| miRNA | Stem loop RT primer –  RNU44 specific | 5`- GTCGTATCCAGTGCGTCGAGTGACACGAGAGCCA  CCTGGGCAATTTGCACTGGATACGAC**AGTCAG**- 3` |
| Stem loop RT primer –  miR-891b specific | 5`- GTCGTATCCAGTGCGTCGAGTGACACGAGAGCCA  CCTGGGCAATTTGCACTGGATACGAC**TCAATG** - 3` |
| Stem loop RT primer –  miR-138-5p specific | 5`- GTCGTATCCAGTGCGTCGAGTGACACGAGAGCCA  CCTGGGCAATTTGCACTGGATACGAC**CGGCCT** - 3` |

**Supplement Table S6. List of gene specific forward primers used for real time PCR experiments:**

| **ncRNAs** | **Forward primer sequences** |
| --- | --- |
| RNU44 | 5`- GCAAATGCTGACTGAACATGA - 3` |
| miR-891b | 5`- CAGTGCAACTTACCTGAGTC - 3` |
| miR-138-5p | 5`- AGCTGGTGTTGTGAATCAG - 3` |

**Supplement Table S7. List of primers used for SYBR® Green gene expression assays:**

| **Gene** | **Forward** | **Reverse** |
| --- | --- | --- |
| *GAPDH* | 5` - AGGGCTGCTTTTAACTCTGGT - 3` | 5` - CCCCACTTGATTTTGGAGGGA - 3` |
| *EGFR - A* | 5` - TGCACAGGACGGGGACCAGAC - 3` | 5` - GCTTGGTTGGGAGCTTCTCCACT - 3` |
| *EGFR - D* | 5` - CCAAACTGCACCTACGGGCCAG- 3` | 5` - GAGGCCGTGATGATCACAGATGCAG - 3` |
| *EGFR - AS1* | 5` - GGAGCGCAGACCGCATGTGAG - 3` | 5` - GCCACCATGCGAAGCCACACTG - 3` |
